# Supplementary material for: Insights into the structure and ionic transport in ‘water-in-bisalt’ electrolytes for lithium-ion batteries
Source: Royal Society of Chemistry journal article supplement (doi:10.1039/d1ma00572c), 2021-01-01
Supplement: d1ma00572c1.pdf [file d1ma00572c1.pdf]

SUPPORTING INFORMATION

# Insights into the structure and ionic transport in ‘water-in-bisalt’ electrolytes for lithium-ion batteries

Thejus R. Kartha, Dhileep N. Reddy and Bhabani S. Mallik\*

Department of Chemistry, Indian Institute of Technology Hyderabad, Sangareddy 502285, Telangana, India

## Non-Bonded Force field parameters

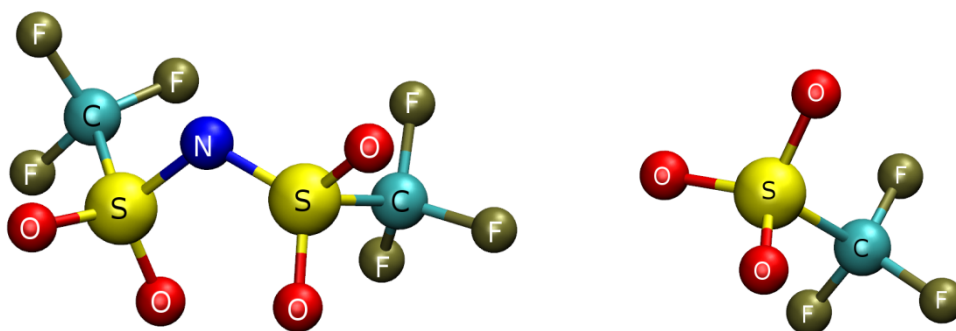

| Atom              | $\sigma$ [nm] | $\epsilon$ [kJ mol <sup>-1</sup> ] | Charge (unscaled) |
|-------------------|---------------|------------------------------------|-------------------|
| Li                | 0.233700      | 0.670000                           | +1.000000         |
| N                 | 0.325000      | 0.711280                           | -0.846520         |
| S <sub>TFSI</sub> | 0.356359      | 1.046000                           | +1.327211         |
| O <sub>TFSI</sub> | 0.295992      | 0.878640                           | -0.623515         |
| C <sub>TFSI</sub> | 0.339967      | 0.457730                           | +0.204906         |
| F <sub>TFSI</sub> | 0.311815      | 0.255224                           | -0.120609         |
| S <sub>OTF</sub>  | 0.356359      | 1.046000                           | +1.150636         |
| O <sub>OTF</sub>  | 0.295992      | 0.878640                           | -0.655529         |
| C <sub>OTF</sub>  | 0.339967      | 0.457730                           | +0.302293         |
| F <sub>OTF</sub>  | 0.311815      | 0.255224                           | -0.162114         |

## Bonded Force Field Parameters (GROMACS .itp file, charges are not scaled)

### TFSI<sup>-</sup>

```
[ atoms ]
; nr  type  resi  res  atom  cgnr      charge      mass
  1  f      1    TFS  F1    1      -0.120609   19.00000
  2  c3     1    TFS  C1    2       0.204906   12.01000
  3  f      1    TFS  F2    3      -0.120609   19.00000
  4  f      1    TFS  F3    4      -0.120609   19.00000
  5  sy     1    TFS  S1    5       1.327211   32.06000
  6  o      1    TFS  O3    6      -0.623515   16.00000
  7  o      1    TFS  O4    7      -0.623515   16.00000
  8  ne     1    TFS  N1    8      -0.846520   14.01000
  9  s6     1    TFS  S2    9       1.327211   32.06000
 10  o      1    TFS  O1   10      -0.623515   16.00000
 11  o      1    TFS  O2   11      -0.623515   16.00000
 12  c3     1    TFS  C2   12       0.204906   12.01000
 13  f      1    TFS  F5   13      -0.120609   19.00000
 14  f      1    TFS  F6   14      -0.120609   19.00000
 15  f      1    TFS  F4   15      -0.120609   19.00000

[ bonds ]
; ai  aj  funct  r          k          ;
  1   2   1     1.3497e-01  2.9865e+05 ; F1 - C1
  2   3   1     1.3497e-01  2.9865e+05 ; C1 - F2
  2   4   1     1.3497e-01  2.9865e+05 ; C1 - F3
  2   5   1     1.8087e-01  1.9481e+05 ; C1 - S1
  5   6   1     1.4660e-01  4.1254e+05 ; S1 - O3
  5   7   1     1.4660e-01  4.1254e+05 ; S1 - O4
  5   8   1     1.6723e-01  2.6535e+05 ; S1 - N1
  8   9   1     1.5540e-01  3.6928e+05 ; N1 - S2
  9  10   1     1.4533e-01  4.2903e+05 ; S2 - O1
  9  11   1     1.4533e-01  4.2903e+05 ; S2 - O2
  9  12   1     1.8075e-01  1.9539e+05 ; S2 - C2
 12  13   1     1.3497e-01  2.9865e+05 ; C2 - F5
 12  14   1     1.3497e-01  2.9865e+05 ; C2 - F6
 12  15   1     1.3497e-01  2.9865e+05 ; C2 - F4

[ pairs ]
; ai  aj  funct
  1   6   1 ; F1 - O3
  1   7   1 ; F1 - O4
  1   8   1 ; F1 - N1
  2   9   1 ; C1 - S2
  3   6   1 ; F2 - O3
  3   7   1 ; F2 - O4
  3   8   1 ; F2 - N1
  4   6   1 ; F3 - O3
  4   7   1 ; F3 - O4
  4   8   1 ; F3 - N1
  5  10   1 ; S1 - O1
  5  11   1 ; S1 - O2
  5  12   1 ; S1 - C2
  6   9   1 ; O3 - S2
  7   9   1 ; O4 - S2
  8  13   1 ; N1 - F5
  8  14   1 ; N1 - F6
  8  15   1 ; N1 - F4
 10  13   1 ; O1 - F5
 10  14   1 ; O1 - F6
 10  15   1 ; O1 - F4
 11  13   1 ; O2 - F5
 11  14   1 ; O2 - F6
 11  15   1 ; O2 - F4

[ angles ]
; ai  aj  ak  funct  theta      cth          ;
  1   2   3   1     1.0736e+02  5.9321e+02 ; F1 - C1 - F2
  1   2   4   1     1.0736e+02  5.9321e+02 ; F1 - C1 - F3
  1   2   5   1     1.0968e+02  5.2819e+02 ; F1 - C1 - S1
  2   5   6   1     1.0785e+02  5.4752e+02 ; C1 - S1 - O3
  2   5   7   1     1.0785e+02  5.4752e+02 ; C1 - S1 - O4
  2   5   8   1     1.0219e+02  5.3614e+02 ; C1 - S1 - N1
  3   2   4   1     1.0736e+02  5.9321e+02 ; F2 - C1 - F3
  3   2   5   1     1.0968e+02  5.2819e+02 ; F2 - C1 - S1
  4   2   5   1     1.0968e+02  5.2819e+02 ; F3 - C1 - S1
  5   8   9   1     1.1918e+02  5.7220e+02 ; S1 - N1 - S2
  6   5   7   1     1.2141e+02  6.0701e+02 ; O3 - S1 - O4
  6   5   8   1     1.0965e+02  5.8827e+02 ; O3 - S1 - N1
  7   5   8   1     1.0965e+02  5.8827e+02 ; O4 - S1 - N1
  8   9  10   1     1.1910e+02  5.9287e+02 ; N1 - S2 - O1
  8   9  11   1     1.1910e+02  5.9287e+02 ; N1 - S2 - O2
  8   9  12   1     1.0819e+02  1.3623e+02 ; N1 - S2 - C2
  9  12  13   1     1.0968e+02  5.2819e+02 ; S2 - C2 - F5
  9  12  14   1     1.0968e+02  5.2819e+02 ; S2 - C2 - F6
  9  12  15   1     1.0968e+02  5.2819e+02 ; S2 - C2 - F4
 10   9  11   1     1.2005e+02  6.1580e+02 ; O1 - S2 - O2
 10   9  12   1     1.0861e+02  5.4702e+02 ; O1 - S2 - C2
 11   9  12   1     1.0861e+02  5.4702e+02 ; O2 - S2 - C2
 13  12  14   1     1.0736e+02  5.9321e+02 ; F5 - C2 - F6
 13  12  15   1     1.0736e+02  5.9321e+02 ; F5 - C2 - F4
 14  12  15   1     1.0736e+02  5.9321e+02 ; F6 - C2 - F4
```

```
[ dihedrals ] ; props
; i j k l func C0 C1 C2 C3 C4 C5
1 2 5 6 3 0.60436 1.81307 0.00000 -2.41742 0.00000 0.00000 ; F1- C1- S1- O3
1 2 5 7 3 0.60436 1.81307 0.00000 -2.41742 0.00000 0.00000 ; F1- C1- S1- O4
1 2 5 8 3 0.60436 1.81307 0.00000 -2.41742 0.00000 0.00000 ; F1- C1- S1- N1
2 5 8 9 3 30.54320 22.17520 0.00000 8.36800 0.00000 0.00000 ; C1- S1- N1- S2
3 2 5 6 3 0.60436 1.81307 0.00000 -2.41742 0.00000 0.00000 ; F2- C1- S1- O3
3 2 5 7 3 0.60436 1.81307 0.00000 -2.41742 0.00000 0.00000 ; F2- C1- S1- O4
3 2 5 8 3 0.60436 1.81307 0.00000 -2.41742 0.00000 0.00000 ; F2- C1- S1- N1
4 2 5 6 3 0.60436 1.81307 0.00000 -2.41742 0.00000 0.00000 ; F3- C1- S1- O3
4 2 5 7 3 0.60436 1.81307 0.00000 -2.41742 0.00000 0.00000 ; F3- C1- S1- O4
4 2 5 8 3 0.60436 1.81307 0.00000 -2.41742 0.00000 0.00000 ; F3- C1- S1- N1
5 8 9 10 3 55.78946 0.00000 -55.78946 0.00000 0.00000 0.00000 ; S1- N1- S2- O1
5 8 9 11 3 55.78946 0.00000 -55.78946 0.00000 0.00000 0.00000 ; S1- N1- S2- O2
5 8 9 12 3 55.78946 0.00000 -55.78946 0.00000 0.00000 0.00000 ; S1- N1- S2- C2
6 5 8 9 3 30.54320 22.17520 0.00000 8.36800 0.00000 0.00000 ; O3- S1- N1- S2
7 5 8 9 3 30.54320 22.17520 0.00000 8.36800 0.00000 0.00000 ; O4- S1- N1- S2
8 9 12 13 3 0.60436 1.81307 0.00000 -2.41742 0.00000 0.00000 ; N1- S2- C2- F5
8 9 12 14 3 0.60436 1.81307 0.00000 -2.41742 0.00000 0.00000 ; N1- S2- C2- F6
8 9 12 15 3 0.60436 1.81307 0.00000 -2.41742 0.00000 0.00000 ; N1- S2- C2- F4
10 9 12 13 3 0.60436 1.81307 0.00000 -2.41742 0.00000 0.00000 ; O1- S2- C2- F5
10 9 12 14 3 0.60436 1.81307 0.00000 -2.41742 0.00000 0.00000 ; O1- S2- C2- F6
10 9 12 15 3 0.60436 1.81307 0.00000 -2.41742 0.00000 0.00000 ; O1- S2- C2- F4
11 9 12 13 3 0.60436 1.81307 0.00000 -2.41742 0.00000 0.00000 ; O2- S2- C2- F5
11 9 12 14 3 0.60436 1.81307 0.00000 -2.41742 0.00000 0.00000 ; O2- S2- C2- F6
11 9 12 15 3 0.60436 1.81307 0.00000 -2.41742 0.00000 0.00000 ; O2- S2- C2- F4
```

## OTF-

```
[ atoms ]
; nr type resi res atom cgnr charge mass ; qtot bond_type
1 f 1 OTF F1 1 -0.162114 19.00000 ; qtot -0.162
2 c3 1 OTF C1 2 0.302293 12.01000 ; qtot 0.140
3 f 1 OTF F2 3 -0.162114 19.00000 ; qtot -0.022
4 f 1 OTF F3 4 -0.162114 19.00000 ; qtot -0.184
5 sy 1 OTF S1 5 1.150636 32.06000 ; qtot 0.967
6 o 1 OTF O2 6 -0.655529 16.00000 ; qtot 0.311
7 o 1 OTF O3 7 -0.655529 16.00000 ; qtot -0.344
8 o 1 OTF O1 8 -0.655529 16.00000 ; qtot -1.000
```

```
[ bonds ]
; ai aj funct r k
1 2 1 1.3497e-01 2.9865e+05 ; F1 - C1
2 3 1 1.3497e-01 2.9865e+05 ; C1 - F2
2 4 1 1.3497e-01 2.9865e+05 ; C1 - F3
2 5 1 1.8075e-01 1.9539e+05 ; C1 - S1
5 6 1 1.4533e-01 4.2903e+05 ; S1 - O2
5 7 1 1.4533e-01 4.2903e+05 ; S1 - O3
5 8 1 1.4533e-01 4.2903e+05 ; S1 - O1
```

```
[ pairs ]
; ai aj funct
1 6 1 ; F1 - O2
1 7 1 ; F1 - O3
1 8 1 ; F1 - O1
3 6 1 ; F2 - O2
3 7 1 ; F2 - O3
3 8 1 ; F2 - O1
4 6 1 ; F3 - O2
4 7 1 ; F3 - O3
4 8 1 ; F3 - O1
```

```
[ angles ]
; ai aj ak funct theta cth
1 2 3 1 1.0736e+02 5.9321e+02 ; F1 - C1 - F2
1 2 4 1 1.0736e+02 5.9321e+02 ; F1 - C1 - F3
1 2 5 1 1.0968e+02 5.2819e+02 ; F1 - C1 - S1
2 5 6 1 1.0861e+02 5.4702e+02 ; C1 - S1 - O2
2 5 7 1 1.0861e+02 5.4702e+02 ; C1 - S1 - O3
2 5 8 1 1.0861e+02 5.4702e+02 ; C1 - S1 - O1
3 2 4 1 1.0736e+02 5.9321e+02 ; F2 - C1 - F3
3 2 5 1 1.0968e+02 5.2819e+02 ; F2 - C1 - S1
4 2 5 1 1.0968e+02 5.2819e+02 ; F3 - C1 - S1
6 5 7 1 1.2005e+02 6.1580e+02 ; O2 - S1 - O3
6 5 8 1 1.2005e+02 6.1580e+02 ; O2 - S1 - O1
7 5 8 1 1.2005e+02 6.1580e+02 ; O3 - S1 - O1
```

```
[ dihedrals ] ; props
; treated as RBs in GROMACS to use combine multiple AMBER torsions per quartet
; i j k l func C0 C1 C2 C3 C4 C5
1 2 5 6 3 0.60436 1.81307 0.00000 -2.41742 0.00000 0.00000 ; F1- C1- S1- O2
1 2 5 7 3 0.60436 1.81307 0.00000 -2.41742 0.00000 0.00000 ; F1- C1- S1- O3
1 2 5 8 3 0.60436 1.81307 0.00000 -2.41742 0.00000 0.00000 ; F1- C1- S1- O1
3 2 5 6 3 0.60436 1.81307 0.00000 -2.41742 0.00000 0.00000 ; F2- C1- S1- O2
3 2 5 7 3 0.60436 1.81307 0.00000 -2.41742 0.00000 0.00000 ; F2- C1- S1- O3
3 2 5 8 3 0.60436 1.81307 0.00000 -2.41742 0.00000 0.00000 ; F2- C1- S1- O1
4 2 5 6 3 0.60436 1.81307 0.00000 -2.41742 0.00000 0.00000 ; F3- C1- S1- O2
4 2 5 7 3 0.60436 1.81307 0.00000 -2.41742 0.00000 0.00000 ; F3- C1- S1- O3
4 2 5 8 3 0.60436 1.81307 0.00000 -2.41742 0.00000 0.00000 ; F3- C1- S1- O1
```

**Table S1: Constituents of the systems of different concentrations.**

| Total number of molecules | No. of Li <sup>+</sup> | No. of TFSI <sup>-</sup> | No. of OTF <sup>-</sup> | No. of water | Corresponding concentration |
|---------------------------|------------------------|--------------------------|-------------------------|--------------|-----------------------------|
| 1000                      | 57                     | 42                       | 15                      | 943          | 5.1 m LiTFSI, 1.7 m LiOTF   |
| 1000                      | 96                     | 70                       | 26                      | 904          | 9 m LiTFSI, 3 m LiOTF       |
| 1000                      | 148                    | 106                      | 42                      | 852          | 15 m LiTFSI, 5 m LiOTF      |
| 1000                      | 193                    | 137                      | 56                      | 807          | 21 m LiTFSI, 7 m LiOTF      |

**Table S2: Ionic conductivities from the current autocorrelation function.**

| Concentration of Electrolyte | Temperature [K] | CACF integral cutoff [ps] | log Ionic Conductivity [mS cm <sup>-1</sup> ] |
|------------------------------|-----------------|---------------------------|-----------------------------------------------|
| 5.1 m LiTFSI, 1.7 m LiOTf    | 298.15          | 1 – 3                     | 1.425                                         |
| 9 m LiTFSI, 3 m LiOTf        | 287.95          | 1 – 3                     | 1.345                                         |
| 9 m LiTFSI, 3 m LiOTf        | 298.15          | 1 – 3                     | 1.472                                         |
| 9 m LiTFSI, 3 m LiOTf        | 327.85          | 1 – 3                     | 1.677                                         |
| 9 m LiTFSI, 3 m LiOTf        | 347.45          | 1 – 3                     | 1.854                                         |
| 15 m LiTFSI, 5 m LiOTf       | 298.15          | 10 – 25                   | 0.882                                         |
| 21 m LiTFSI, 7 m LiOTf       | 298.15          | 10 – 25                   | 0.902                                         |

**Table S3: Fitting parameters of the ion cage correlation function for Li–O<sub>anion</sub> interactions.**

| <i>Temperature</i><br>[K] | <i>LiTFSI</i><br>[m] | <i>LiOTF</i><br>[m] | $a_0$    | $\tau_1$<br>[ps] | $\tau_2$<br>[ps] | <i>Correlation</i><br><i>coefficient</i> |
|---------------------------|----------------------|---------------------|----------|------------------|------------------|------------------------------------------|
| 298.15                    | 5.1                  | 1.7                 | 1.02033  | 48.1471          | 0.515144         | 0.999618                                 |
|                           |                      |                     | 1.03305  | 40.0989          | 0.523274         | 0.999654                                 |
|                           |                      |                     | 1.01411  | 42.8584          | 0.540225         | 0.999632                                 |
| 287.95                    | 9                    | 3                   | 0.949172 | 115.1            | 0.548081         | 0.99791                                  |
|                           |                      |                     | 0.881211 | 176.585          | 0.602537         | 0.996521                                 |
|                           |                      |                     | 0.911435 | 131.229          | 0.591116         | 0.997702                                 |
| 298.15                    | 9                    | 3                   | 0.934887 | 103.887          | 0.568765         | 0.998824                                 |
|                           |                      |                     | 0.920482 | 117.761          | 0.551427         | 0.997345                                 |
|                           |                      |                     | 0.926534 | 118.64           | 0.56465          | 0.998055                                 |
| 327.85                    | 9                    | 3                   | 1.04032  | 27.7114          | 0.490971         | 0.999679                                 |
|                           |                      |                     | 1.02523  | 29.442           | 0.512611         | 0.999858                                 |
|                           |                      |                     | 1.0342   | 27.3171          | 0.502573         | 0.999733                                 |
| 347.45                    | 9                    | 3                   | 1.03322  | 17.5079          | 0.507619         | 0.999707                                 |
|                           |                      |                     | 1.05056  | 16.8972          | 0.481333         | 0.999312                                 |
|                           |                      |                     | 1.02474  | 17.0258          | 0.522158         | 0.999806                                 |
| 298.15                    | 15                   | 5                   | 0.904277 | 147.463          | 0.597415         | 0.998113                                 |
|                           |                      |                     | 0.873953 | 177.267          | 0.601865         | 0.996003                                 |
|                           |                      |                     | 0.91374  | 141.979          | 0.583978         | 0.998317                                 |
| 298.15                    | 21                   | 7                   | 0.868283 | 224.473          | 0.603767         | 0.996791                                 |
|                           |                      |                     | 0.840487 | 281.271          | 0.631235         | 0.995501                                 |
|                           |                      |                     | 0.848863 | 271.326          | 0.62679          | 0.995585                                 |

**Table S4: Fitting parameters of the ion cage correlation function for Li–O<sub>water</sub> interactions.**

| Temperature [K] | LiTFSI [m] | Li-OTF [m] | $a_0$    | $\tau_1$ [ps] | $\tau_2$ [ps] | Correlation coefficient |
|-----------------|------------|------------|----------|---------------|---------------|-------------------------|
| 298.15          | 5.1        | 1.7        | 1.03798  | 17.9347       | 0.596552      | 0.999277                |
|                 |            |            | 1.03157  | 17.6376       | 0.609246      | 0.999455                |
|                 |            |            | 1.03047  | 17.8831       | 0.612194      | 0.999429                |
| 287.95          | 9          | 3          | 1.05988  | 30.6168       | 0.544962      | 0.999231                |
|                 |            |            | 1.07015  | 30.6512       | 0.529005      | 0.999056                |
|                 |            |            | 1.06243  | 31.3487       | 0.54077       | 0.999219                |
| 298.15          | 9          | 3          | 1.06634  | 24.4001       | 0.531665      | 0.999008                |
|                 |            |            | 1.0624   | 24.2774       | 0.535641      | 0.999143                |
|                 |            |            | 1.06571  | 25.1879       | 0.52561       | 0.999151                |
| 327.85          | 9          | 3          | 1.03479  | 13.7313       | 0.583756      | 0.99938                 |
|                 |            |            | 1.0365   | 13.9514       | 0.577705      | 0.999356                |
|                 |            |            | 1.03585  | 14.1791       | 0.580553      | 0.999395                |
| 347.45          | 9          | 3          | 1.02544  | 10.5111       | 0.600852      | 0.999502                |
|                 |            |            | 1.02639  | 10.3584       | 0.598574      | 0.999471                |
|                 |            |            | 1.02632  | 10.4184       | 0.601204      | 0.999469                |
| 298.15          | 15         | 5          | 1.05624  | 39.4172       | 0.524616      | 0.999532                |
|                 |            |            | 1.08091  | 36.8368       | 0.488154      | 0.999042                |
|                 |            |            | 1.06937  | 38.76         | 0.505223      | 0.999351                |
| 298.15          | 21         | 7          | 0.869959 | 89.9256       | 0.520717      | 0.997487                |
|                 |            |            | 0.913859 | 68.8989       | 0.476866      | 0.998377                |
|                 |            |            | 0.902849 | 78.1586       | 0.504852      | 0.998416                |

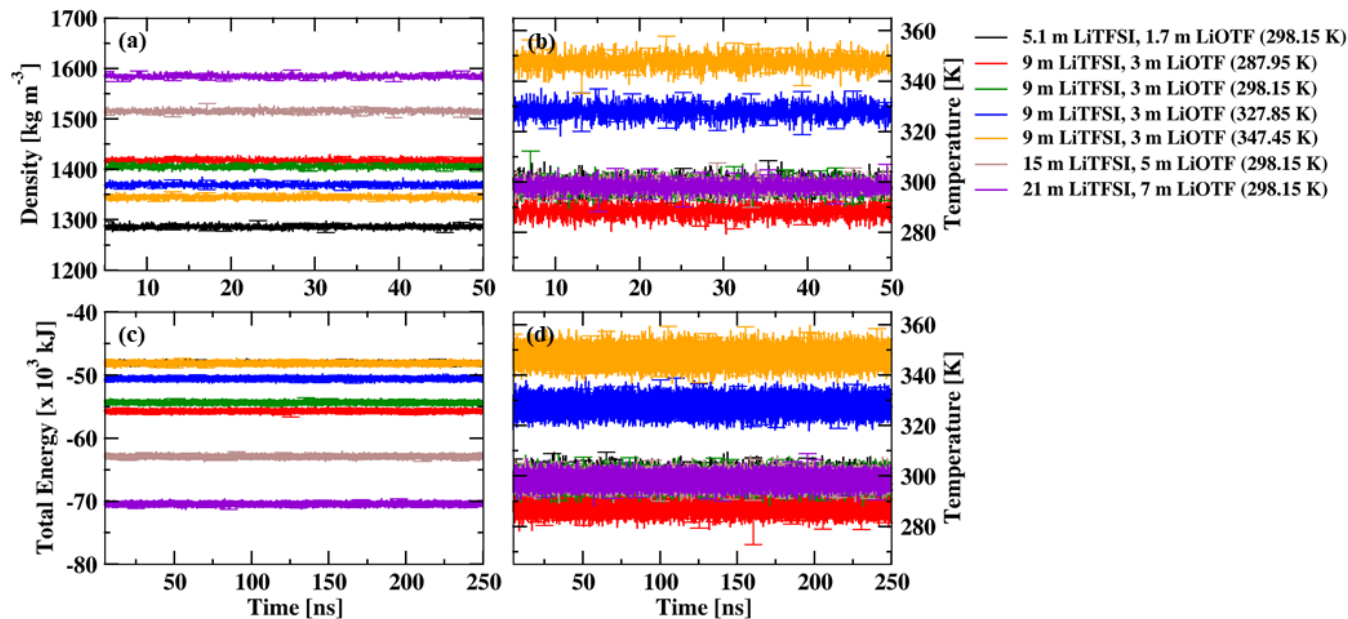

**Figure S1.** Physical properties converging during the molecular dynamics simulations of different concentrations of the WiBS electrolyte at different temperatures: (a) Density during 50 ns of NPT (b) Temperature during 50 ns of NVT (c) Total energy during 250 ns of NVE (d) Temperature during 250 ns of NVE.

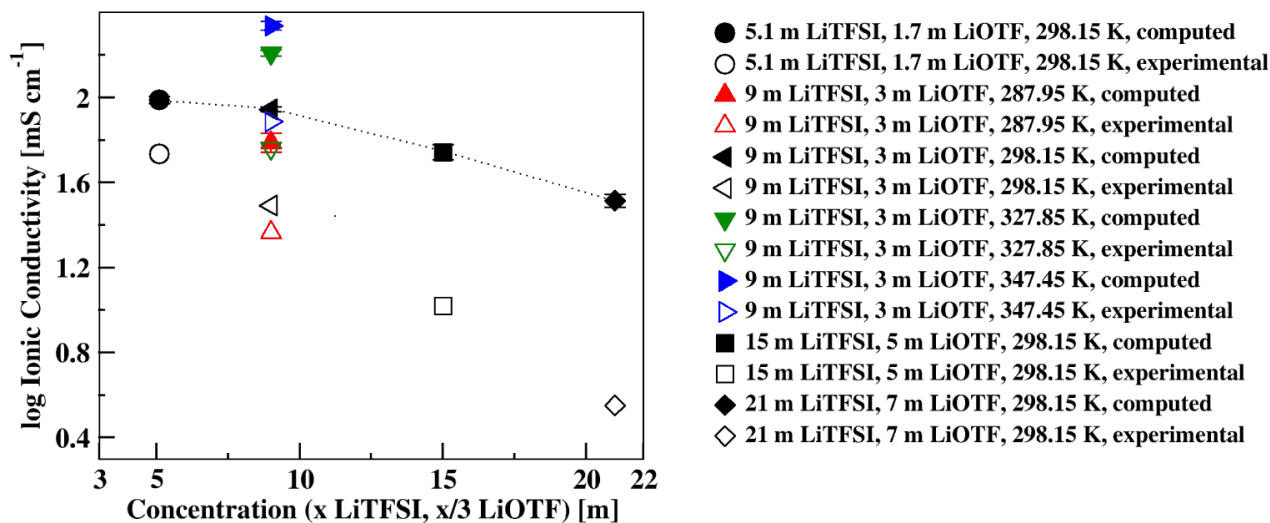

**Figure S2.** Ionic conductivities calculated by the Nernst-Einstein method for WiBS electrolyte mixtures at different concentrations and temperatures. The experimental values[1] for each calculated value are also provided for reference.

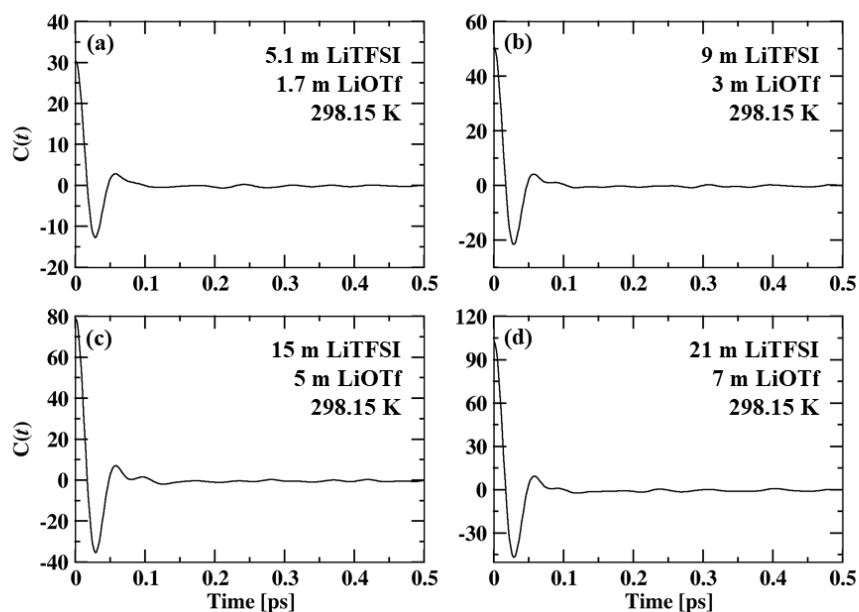

**Figure S3.** Current autocorrelation functions of the electrolytes of different concentrations at 298.15 K.

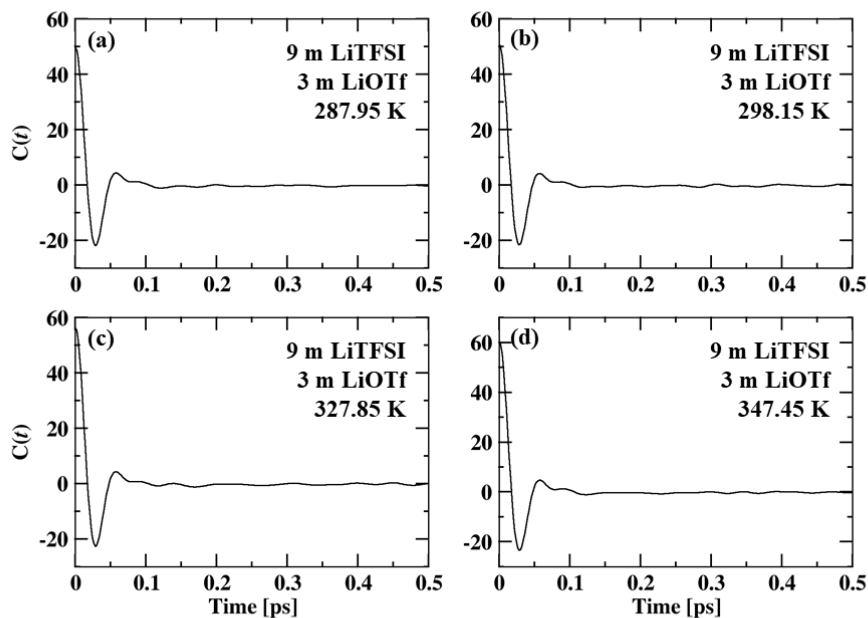

**Figure S4.** Current autocorrelation functions of the 9 m LiTFSI – 3 m LiOTf electrolyte at different temperatures.

## REFERENCES

- [1] M.S. Ding, A. von Cresce, K. Xu, Conductivity, Viscosity, and Their Correlation of a Super-Concentrated Aqueous Electrolyte, *J. Phys. Chem. C* 121 (2017) 2149–2153. <https://doi.org/10.1021/acs.jpcc.6b12636>.
